# Supplementary material for: An Update on the Management of Acute High-Risk Pulmonary Embolism
Source: MDPI journal article supplement (doi:10.3390/jcm11164807), 2022-08-17
Supplement: s1 [file s1]

**Supplemental material File S1. Detailed search terms.**

**An update on the management of acute high-risk pulmonary embolism**

**eAppendix**

## Pubmed database history and Search Details

| Search | Query                                                                                                                                                                                                       | Results |
|--------|-------------------------------------------------------------------------------------------------------------------------------------------------------------------------------------------------------------|---------|
| #1     | Search: ((pulmonary embolism[Title]) AND (high-risk[Title] OR high risk[Title] OR massive[Title]) ) AND (("2000/01/01"[Date - Publication] : "2022/05/31"[Date - Publication])) Sort by: <b>Most Recent</b> | 1,025   |

## Ovid search history

|   | Searches                                    | Results |
|---|---------------------------------------------|---------|
| 1 | pulmonary embolism.m_titl.                  | 7300    |
| 2 | limit 1 to yr="2000 -Current"               | 6217    |
| 3 | (high-risk or high risk or massive).m_titl. | 32526   |
| 4 | limit 3 to yr="2000 -Current"               | 28308   |
| 5 | 2 and 4                                     | 508     |

## Cochrane data search history

(high risk OR high-risk OR massive) "pulmonary embolism"

Cochrane Library publication date from Jan 2000 to May 2022

in Cochrane Reviews (Word variations have been searched). 373 results
